# Supplementary material for: Naked-Eye Detection of Morphine by Au@Ag Nanoparticles-Based Colorimetric Chemosensors
Source: MDPI journal article supplement (doi:10.3390/s22052072), 2022-03-07
Supplement: s1 [file s1]

# Naked-Eye Detection of Morphine by Au@Ag Nanoparticles-Based Colorimetric Chemosensors

Tahereh Rohani Bastami <sup>1,\*</sup>, Mansour Bayat <sup>1</sup> and Roberto Paolesse <sup>2,\*</sup>

<sup>1</sup> Department of Chemical Engineering and Energy, Quchan University of Technology, Quchan 94771-67335, Iran; mansour.chem@gmail.com

<sup>2</sup> Department of Chemical Science and Technologies, University of Rome Tor Vergata, Via Della Ricerca Scientifica 1, 00133 Rome, Italy

\* Correspondence: t.rohani@qiet.ac.ir (T.R.B.); roberto.paolesse@uniroma2.it (R.P.)

## Supplementary Information

**Table S1:** Physicochemical properties of morphine [1].

| Drug                                | Chemical name and formula                                                                                                                                         | Structure                                                                            | So H <sub>2</sub> O (25°C mg.mL <sup>-1</sup> ) | pKa |
|-------------------------------------|-------------------------------------------------------------------------------------------------------------------------------------------------------------------|--------------------------------------------------------------------------------------|-------------------------------------------------|-----|
| Morphine sulfate salt pentahydrate, | 7,8-Didehydro-4,5a-epoxy-17-methylmorphinan-3,6-a-diol sulfate (2:1 salt)<br>C <sub>34</sub> H <sub>40</sub> N <sub>2</sub> O <sub>10</sub> S · 5H <sub>2</sub> O | 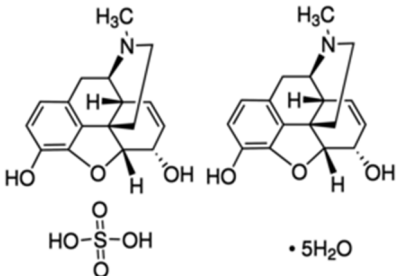 | 64                                              | 8.5 |

## References

1. Sheibani, A.; Shishehbore, M.R.; Mirparizi, E. Kinetic spectrophotometric method for the determination of morphine in biological samples. *Spectrochim. Acta Part A Mol. Biomol. Spectrosc.* **2010**, *77*, 535–538.

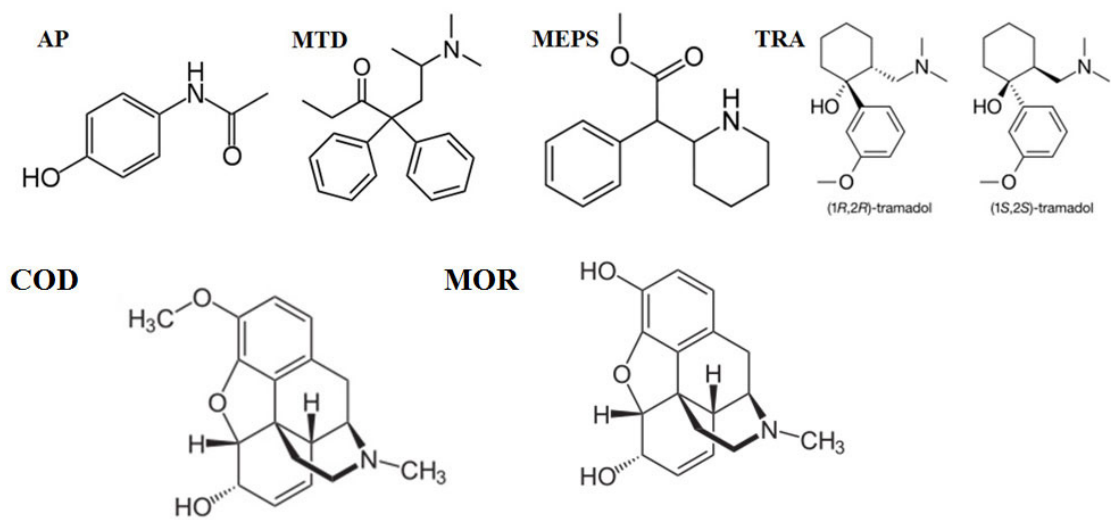

**Figure S1.** Chemical structure of drugs
